# Supplementary material
Source: PubMed Central journal article supplement (PMC2753189)
Supplement: NIHMS138377-supplement-1.pdf [file NIHMS138377-supplement-1.pdf]

Type of file: figure

Label: Fig. S1

Filename: 1170905s1.pdf

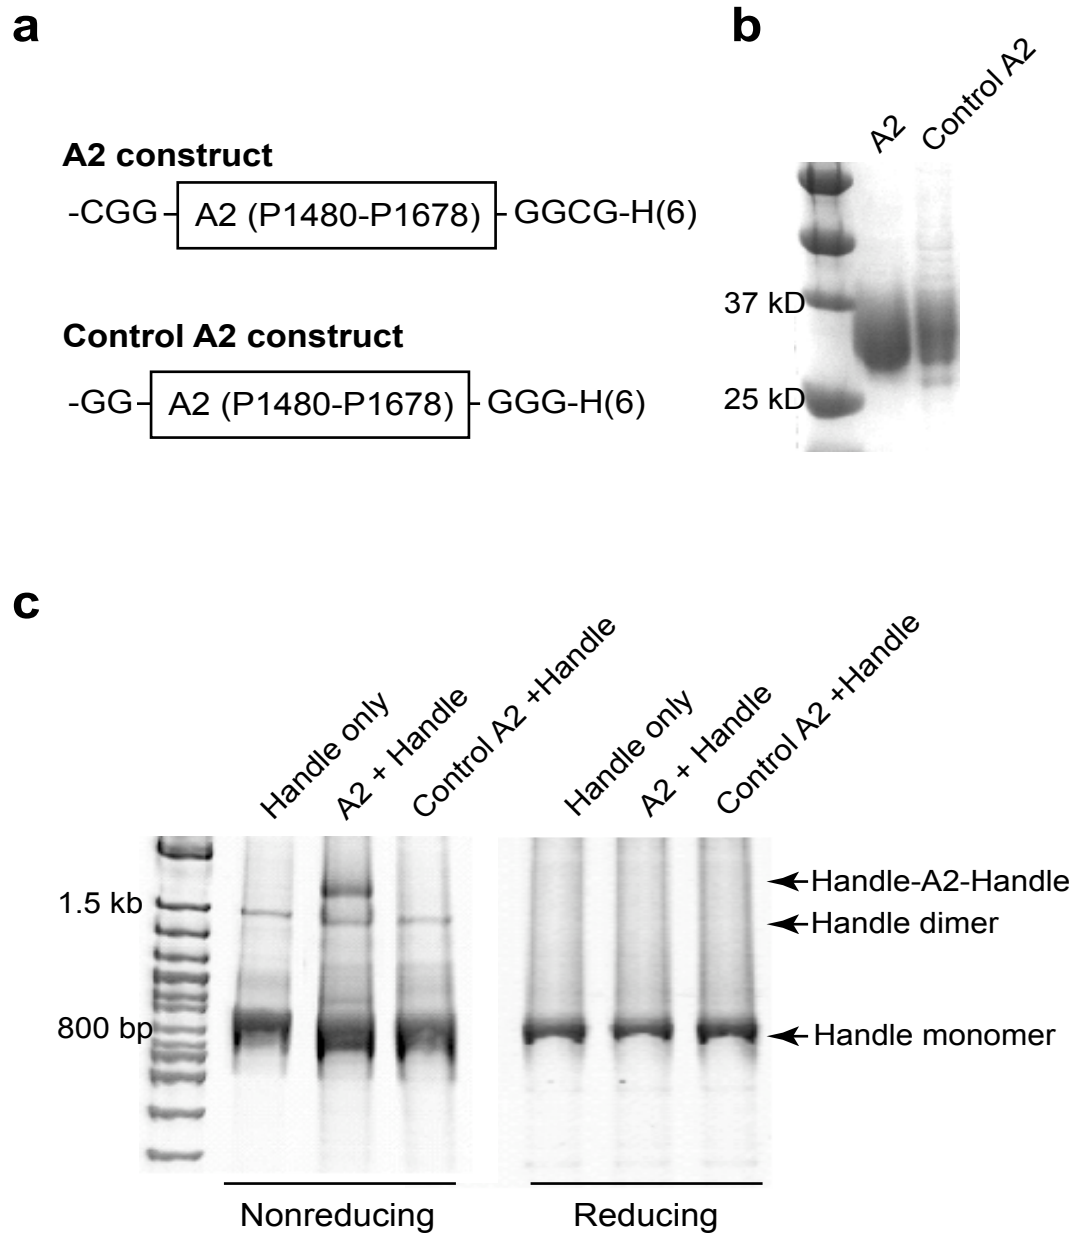

**Fig. S1**

Type of file: figure

Label: Fig. S2

Filename: 1170905s2.pdf

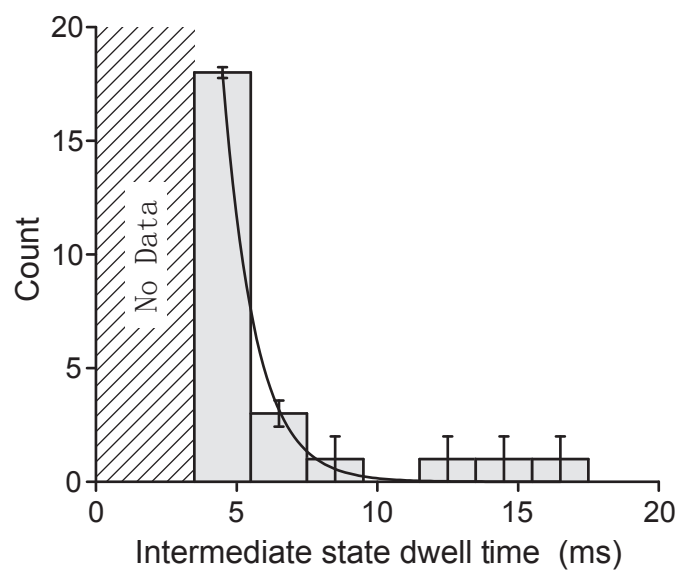

**Fig. S2**

Type of file: figure

Label: Fig. S3

Filename: 1170905s3.pdf

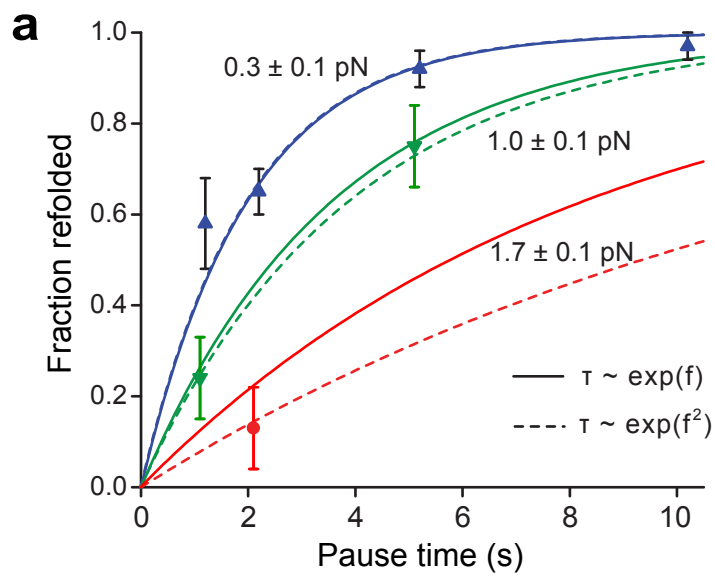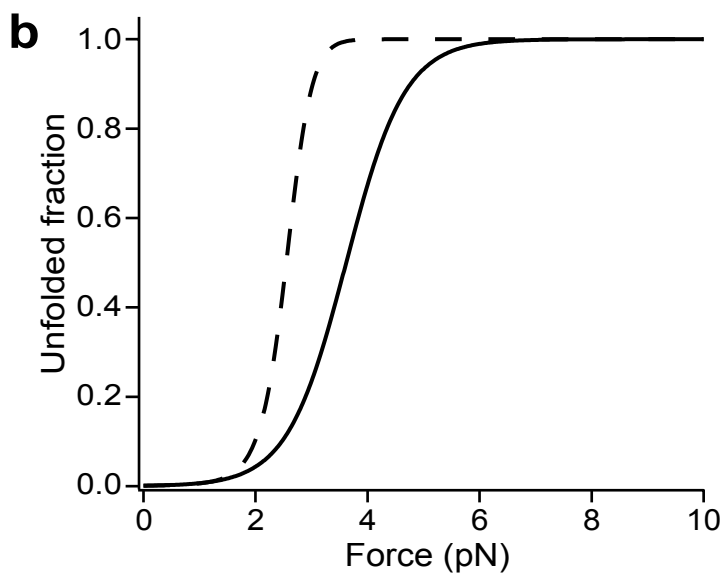

**Fig. S3**
